# Supplementary material
Source: PubMed Central journal article supplement (PMC1312422)

**NT**

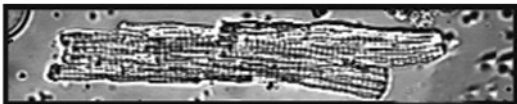

**WT**

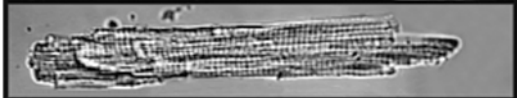

**R92W**

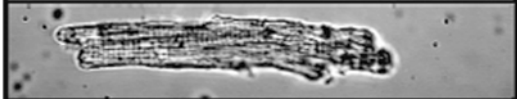

**R92L**

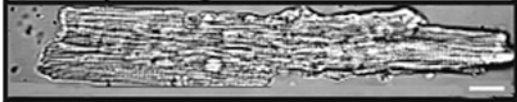

Supplement: pnas_0509181102_1.pdf [file pnas_0509181102_1.pdf]

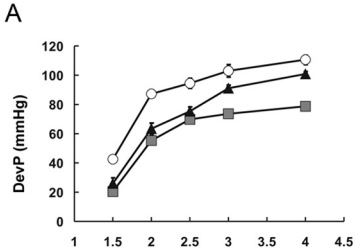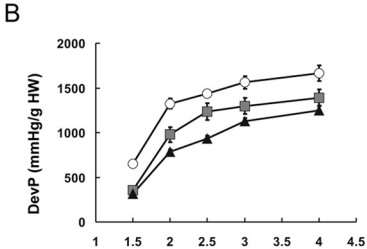

Supplement: pnas_0509181102_2.pdf [file pnas_0509181102_2.pdf]
